# Supplementary material for: mitoTev‐TALE: a monomeric DNA editing enzyme to reduce mutant mitochondrial DNA levels
Source: PubMed Central journal article supplement (PMC6127889; doi:10.15252/emmm.201708084), 2018-07-16
Supplement: EMMM-10-e8084-s001.pdf [file EMMM-10-e8084-s001.pdf]

## **APPENDIX**

APPENDIX TABLE S1  
DETAILED STATISTICAL RESULTS

FIGURE 2B  
FIGURE 2D  
FIGURE 2E  
FIGURE 2F

FIGURE 3B  
FIGURE 3C  
FIGURE 3F  
FIGURE 3G

FIGURE 4B  
FIGURE 4C  
FIGURE 4D  
FIGURE 4E

EXPANDED FIGURE EV1D

| Figure 2B |        |         |               |          |
|-----------|--------|---------|---------------|----------|
|           |        | N value | exact p value | asterics |
|           | UNT    | 11      | N/A           |          |
|           | Black  | 5       | 0.4988        | ns       |
|           | Yellow | 5       | 6.11362E-06   | ****     |
|           | GFP+   | 12      | 0.027629843   | *        |
|           | GFP++  | 12      | 3.12849E-06   | ****     |
| Figure 2D |        |         |               |          |
|           |        | N value | exact p value | asterics |
| 1 day     | UNT    | 3       | N/A           |          |
|           | GFP+   | 3       | 0.0145        | *        |
|           | GFP++  | 3       | 0.0016        | **       |
| 15 days   | UNT    | 3       | N/A           |          |
|           | GFP+   | 3       | 0.2317        | ns       |
|           | GFP++  | 3       | 0.006         | **       |
| Figure 2E |        |         |               |          |
|           |        | N value | exact p value | asterics |
| 1 day     | UNT    | 6       | N/A           |          |
|           | GFP+   | 5       | 0.852         | ns       |
|           | GFP++  | 6       | 0.0013        | **       |
| 15 days   | UNT    | 4       | N/A           |          |
|           | GFP+   | 3       | 0.5998        | ns       |
|           | GFP++  | 3       | 0.0242        | *        |
| Figure 2F |        |         |               |          |
|           |        | N value | exact p value | asterics |
| 1 day     | UNT    | 6       | N/A           |          |
|           | GFP+   | 6       | 0.1692        | ns       |
|           | GFP++  | 6       | 0.3796        | ns       |

| Figure 3B  |        |         |               |          |
|------------|--------|---------|---------------|----------|
|            |        | N value | exact p value | asterics |
| 2-3 days   | UNT    | 8       | N/A           |          |
|            | GFP+   | 8       | 0.2533        | ns       |
|            | GFP++  | 8       | 0.0002        | ***      |
| 15-20 days | UNT    | 7       | N/A           |          |
|            | GFP+   | 7       | 0.0227        | *        |
|            | GFP++  | 7       | 1.99367E-05   | ****     |
| 23-27 days | UNT    | 6       | N/A           |          |
|            | GFP+   | 6       | 0.0269        | *        |
|            | GFP++  | 6       | 0.0002        | ***      |
| Figure 3C  |        |         |               |          |
|            |        | N value | exact p value | asterics |
| 2-3 days   | UNT    | 7       | N/A           |          |
|            | GFP+   | 7       | 0.131         | ns       |
|            | GFP++  | 7       | 8.96389E-05   | ****     |
| 15-20 days | UNT    | 5       | N/A           |          |
|            | GFP+   | 6       | 0.9012        | ns       |
|            | GFP++  | 6       | 0.00051       | ***      |
| 23-27 days | UNT    | 6       | N/A           |          |
|            | GFP+   | 6       | 0.382         | ns       |
|            | GFP++  | 6       | 0.00251       | **       |
| Figure 3F  |        |         |               |          |
|            |        | N value | exact p value | asterics |
| 2 day      | UNT    | 4       | N/A           |          |
|            | GFP+   | 4       | 0.0036        | **       |
|            | GFP++  | 4       | 0.0145        | *        |
|            | GFP+++ | 4       | 0.0001        | ***      |
| 15 days    | UNT    | 3       | N/A           |          |
|            | GFP+   | 3       | 0.7704        |          |
|            | GFP++  | 3       | 0.0087        | **       |
|            | GFP+++ | 3       | 3.2429E-05    | ****     |
| Figure 3G  |        |         |               |          |
|            |        | N value | exact p value | asterics |
| 2 day      | UNT    | 7       | N/A           |          |
|            | GFP+   | 7       | 0.2742        | ns       |
|            | GFP++  | 7       | 0.00006       | ****     |
|            | GFP+++ | 4       | 3.74249E-12   | ****     |
| 15 days    | UNT    | 4       | N/A           |          |
|            | GFP+   | 4       | 0.9277        | ns       |
|            | GFP++  | 4       | 0.0907        | ns       |
|            | GFP+++ | 4       | 0.5048        | ns       |

| Figure 4B                       |       |         |               |          |
|---------------------------------|-------|---------|---------------|----------|
|                                 |       | N value | exact p value | asterics |
| Basal                           | UNT   | 5       | N/A           |          |
|                                 | GFP+  | 5       | 0.0021        | **       |
|                                 | GFP++ | 5       | 0.0268        | *        |
|                                 | WT    | 4       | 0.0005        | ***      |
| Maximal                         | UNT   | 6       | N/A           |          |
|                                 | GFP+  | 5       | 0.0011        | **       |
|                                 | GFP++ | 5       | 0.0321        | *        |
|                                 | WT    | 4       | 0.0011        | **       |
| Spare capacity                  | UNT   | 6       | N/A           |          |
|                                 | GFP+  | 5       | 0.0012        | **       |
|                                 | GFP++ | 5       | 0.0494        | *        |
|                                 | WT    | 4       | 0.0055        | **       |
| ATP-linked                      | UNT   | 6       | N/A           |          |
|                                 | GFP+  | 5       | 0.0006        | ***      |
|                                 | GFP++ | 5       | 0.0178        | *        |
|                                 | WT    | 4       | 0.0002        | ***      |
| Figure 4C                       |       |         |               |          |
|                                 |       | N value | exact p value | asterics |
| Coupling efficiency (%)         | UNT   | 6       | N/A           |          |
|                                 | GFP+  | 5       | 0.0003        | ***      |
|                                 | GFP++ | 5       | 0.0002        | ***      |
|                                 | WT    | 4       | 0.0002        | ***      |
| Figure 4D                       |       |         |               |          |
|                                 |       | N value | exact p value | asterics |
| Mitochondrial Protein synthesis | UNT   | 4       | N/A           |          |
|                                 | GFP+  | 5       | 0.0589        | ns       |
|                                 | GFP++ | 5       | 0.0026        | **       |
|                                 | WT    | 2       | N/A           |          |
| Figure 4E                       |       |         |               |          |
|                                 |       | N value | exact p value | asterics |
| NDUFB8                          | UNT   | 6       | N/A           |          |
|                                 | GFP+  | 6       | 0.075         | ns       |
|                                 | GFP++ | 6       | 0.0315        | *        |
| COXI                            | UNT   | 6       | N/A           | ns       |
|                                 | GFP+  | 6       | 0.0211        | *        |
|                                 | GFP++ | 6       | 0.1533        | ns       |
| SDHA                            | UNT   | 6       | N/A           | ns       |
|                                 | GFP+  | 6       | 0.4805        | ns       |
|                                 | GFP++ | 6       | 0.5787        | ns       |
| Fig. EV1D                       |       |         |               |          |
|                                 |       | N value | exact p value | asterics |
| 1 day                           | UNT   | 10      | N/A           |          |
|                                 | GFP+  | 9       | 0.5635        | ns       |
|                                 | GFP++ | 9       | 0.0023        | **       |
| 15 days                         | UNT   | 4       | N/A           |          |
|                                 | GFP+  | 4       | 0.7572        | ns       |
|                                 | GFP++ | 3       | 9.00458E-05   | ****     |
