# Supplementary material for: mitoTev‐TALE: a monomeric DNA editing enzyme to reduce mutant mitochondrial DNA levels
Source: PubMed Central journal article supplement (PMC6127889; doi:10.15252/emmm.201708084), 2018-07-16
Supplement: EMMM-10-e8084-s002.pdf [file EMMM-10-e8084-s002.pdf]

## Expanded View Figures

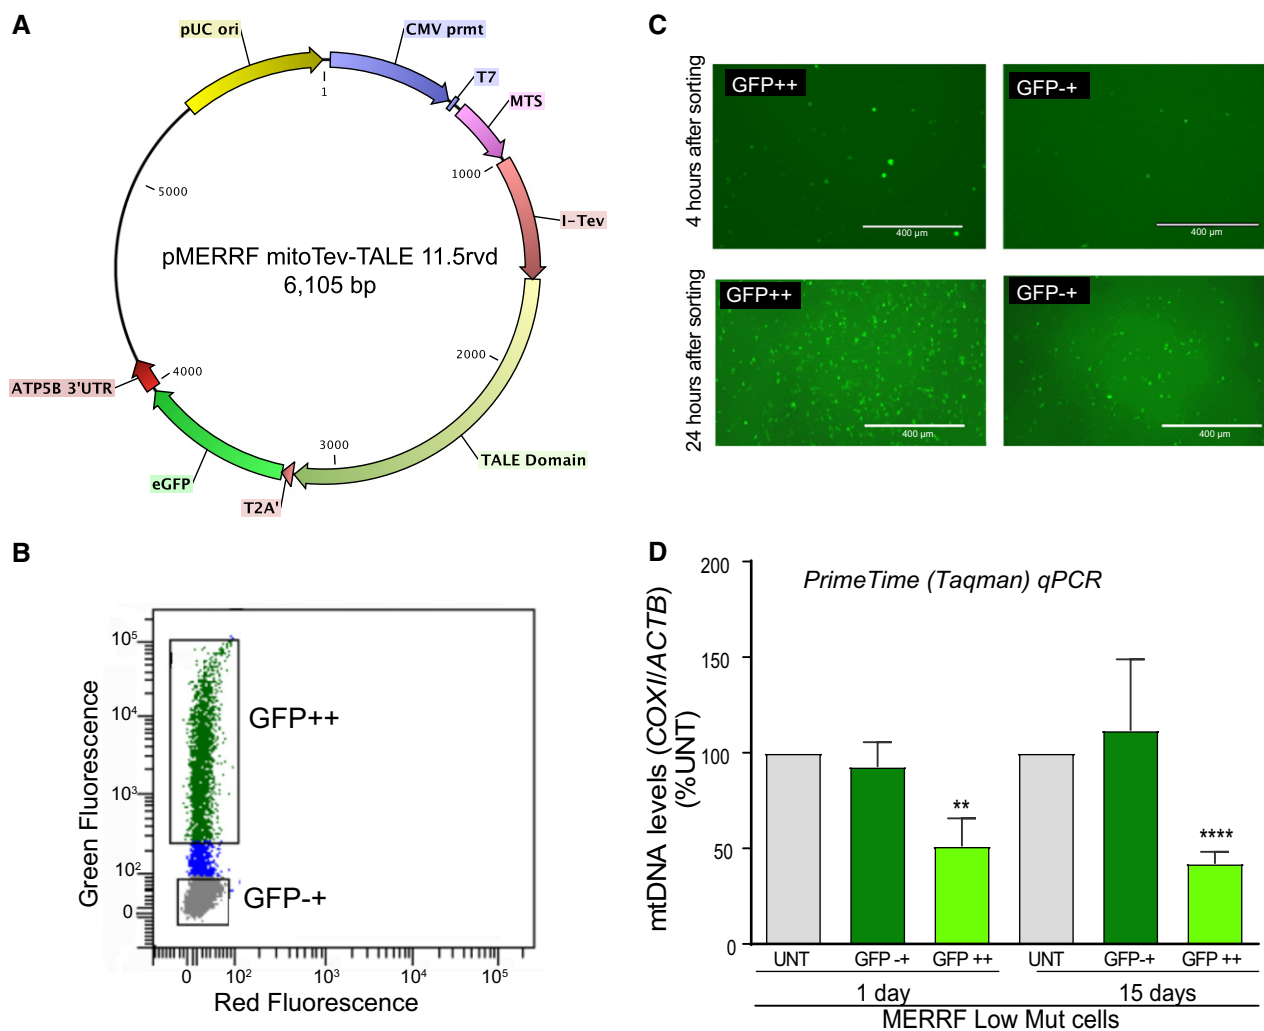

**Figure EV1. Cell sorting of cybrids transfected with the plasmid coding for the MERRF mitoTev-TALE.**

- A Plasmid expressing the MERRF mitoTev-TALE, showing the location of the eGFP gene.
- B FACS gating of cells transfected (24 h) and sorted by GFP fluorescence. Cells sorted as positive for the eGFP marker were termed “GFP++”, and cells without detectable fluorescence were termed “GFP-+”.
- C Fluorescence microscopy showing the presence of some GFP-positive cells in the GFP-+ population (4 and 24 h after sorting).
- D Determination of the total mtDNA levels 1 and 15 days after transfection in clone 7 from the first set of sortings. The graph shows the ratio of (COXI/ACTB) PrimeTime probes. Data are mean  $\pm$  SEM of  $n = 9-10$ , 1 day;  $n = 3-4$ , 15 days. Statistical analysis was performed using two-tailed Student's *t*-test between two groups (UNT. vs GFP-+ or UNT. vs GFP++, \*\* $P < 0.005$ ; \*\*\*\* $P < 0.0001$ ).

## MitoTev-TALE (8.5 RVD)

MSVLTPLLLRLTGSARRLPVPRAKIHSLPPEGKLMASRVLASRLASQMAASAKVARPAVRVA  
 QVSKRTIQTGSPLQTLKRTQMTSIVNATTRQAFQKRAYSSPAGMGKSGIYQIKNTLNNKVYVGS  
 AKDFEKRWKRHFKDLEKGCHSSIKLQRSFNKHGNVFECSILEEIPYEKDLIERENFWIKELNSKI  
 NGYNIADATFGDTCSTHPLKEEIIKKRSETVKAKMLKLGPDGRKALYSKPGSGDIADLRTLGYSSQ  
 QQQEKIKPKVRSTVAQHHEALVGHGFTHAHIVALSQHPAALGTVAVKYQDMIAALPEATHEAIV  
 GVGKQWSGARALEALLTVAGELRGPPLQLDTGQLLKIARKGGVTAVEAVHAWRNALTGAPLNL  
 TPQQVVAIASNNGGKQALETVQALLPVLCQAHGLTPQQVVAIASNNGGKQALETVQRLLPVLC  
 QAHGLTPEQVVAIASHDGGKQALETVQRLLPVLCQAHGLTPQQVVAIASNGGGKQALETVQRL  
 LPVLCQAHGLTPEQVVAIASHDGGKQALETVQRLLPVLCQAHGLTPQQVVAIASNGGGKQALE  
 TVQRLLPVLCQAHGLTPEQVVAIASHDGGKQALETVQALLPVLCQAHGLTPQQVVAIASNGGG  
 KQALETVQRLLPVLCQAHGLTPQQVVAIASNGGGRPALESIVAQLSRPDPALAALTNDHLVALA  
 CLGGRPALDAVKKGLG

## MitoTev-TALE (11.5 RVD)

MSVLTPLLLRLTGSARRLPVPRAKIHSLPPEGKLMASRVLASRLASQMAASAKVARPAVRVA  
 QVSKRTIQTGSPLQTLKRTQMTSIVNATTRQAFQKRAYSSPAGMGKSGIYQIKNTLNNKVYVGS  
 AKDFEKRWKRHFKDLEKGCHSSIKLQRSFNKHGNVFECSILEEIPYEKDLIERENFWIKELNSKI  
 NGYNIADATFGDTCSTHPLKEEIIKKRSETVKAKMLKLGPDGRKALYSKPGSGDIADLRTLGYSSQ  
 QQQEKIKPKVRSTVAQHHEALVGHGFTHAHIVALSQHPAALGTVAVKYQDMIAALPEATHEAIV  
 GVGKQWSGARALEALLTVAGELRGPPLQLDTGQLLKIARKGGVTAVEAVHAWRNALTGAPLNL  
 TPQQVVAIASNNGGKQALETVQALLPVLCQAHGLTPQQVVAIASNNGGKQALETVQRLLPVLC  
 QAHGLTPEQVVAIASHDGGKQALETVQRLLPVLCQAHGLTPQQVVAIASNGGGKQALETVQRL  
 LPVLCQAHGLTPEQVVAIASHDGGKQALETVQRLLPVLCQAHGLTPQQVVAIASNGGGKQALE  
 TVQRLLPVLCQAHGLTPEQVVAIASHDGGKQALETVQALLPVLCQAHGLTPQQVVAIASNGGG  
 KQALETVQRLLPVLCQAHGLTPQQVVAIASNGGGKQALETVQRLLPVLCQAHGLTPEQVVAIAS  
 NIGGKQALETVQRLLPVLCQAHGLTPEQVVAIASNIGGKQALETVQRLLPVLCQAHGLTPQQV  
 AIASNGGGRPALESIVAQLSRPDPALAALTNDHLVALACLGGRPALDAVKKGLGDL

**Figure EV2. Protein sequence of mitoTev-TALEs.**

The I-Tev1 domain composed of 137 amino acids is highlighted in blue; the TALE N-terminal is highlighted in green, and the respective RVDs (either 8.5 or 11.5) are highlighted in yellow.

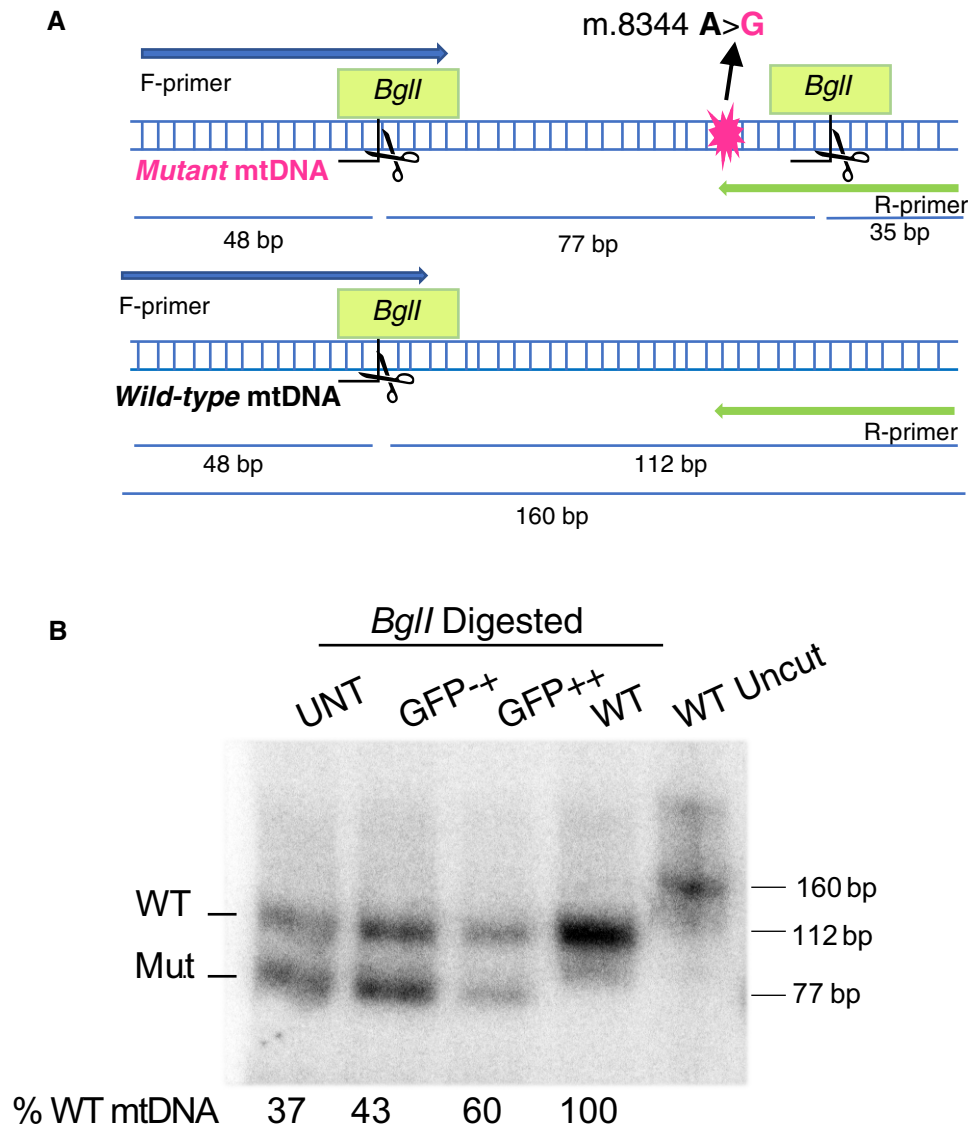

**Figure EV3. Alternative RFLP for the detection of the m.8344A>G mtDNA mutation.**

A Schematic representation of the mtDNA region surrounding the m.8344A>G. The R-primer (green) creates a *BglI* site only in the mutant mtDNA sequence, which allows the determination of the mtDNA heteroplasmy in the tested cells. The F-primer adds an additional *BglI* site, assuring that digestion is complete.

B After *BglI* digestion, the “last-cycle hot” labeled DNA samples are electrophoresed in a 12% polyacrylamide gel and exposed to a phosphorimager screen.
