# Supplementary material for: mitoTev‐TALE: a monomeric DNA editing enzyme to reduce mutant mitochondrial DNA levels
Source: PubMed Central journal article supplement (PMC6127889; doi:10.15252/emmm.201708084), 2018-07-16

C

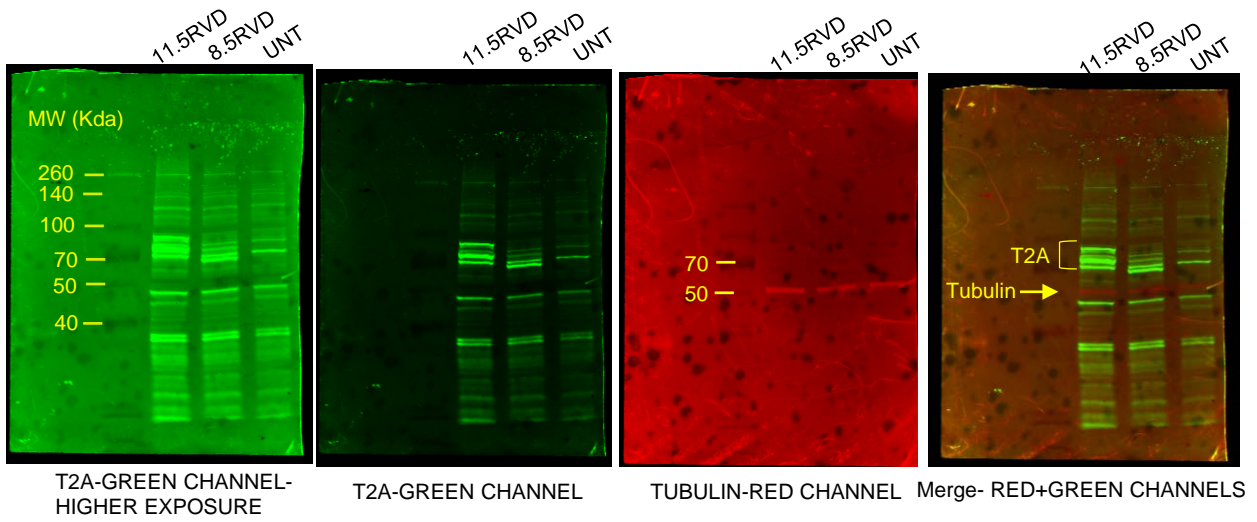

D

11.5RVD MERRF mitoTev-TALE

8.5RVD MERRF mitoTev-TALE

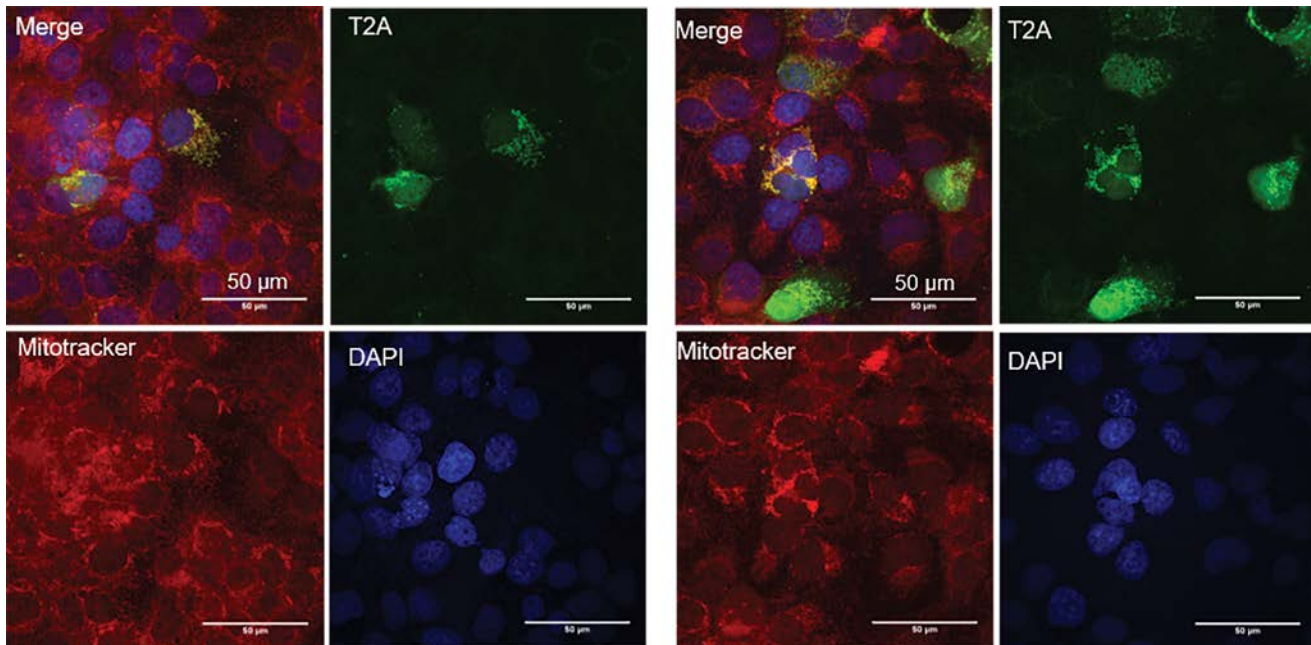

Supplement: EMMM-10-e8084-s003.pdf [file EMMM-10-e8084-s003.pdf]
