# Supplementary material for: mitoTev‐TALE: a monomeric DNA editing enzyme to reduce mutant mitochondrial DNA levels
Source: PubMed Central journal article supplement (PMC6127889; doi:10.15252/emmm.201708084), 2018-07-16

D

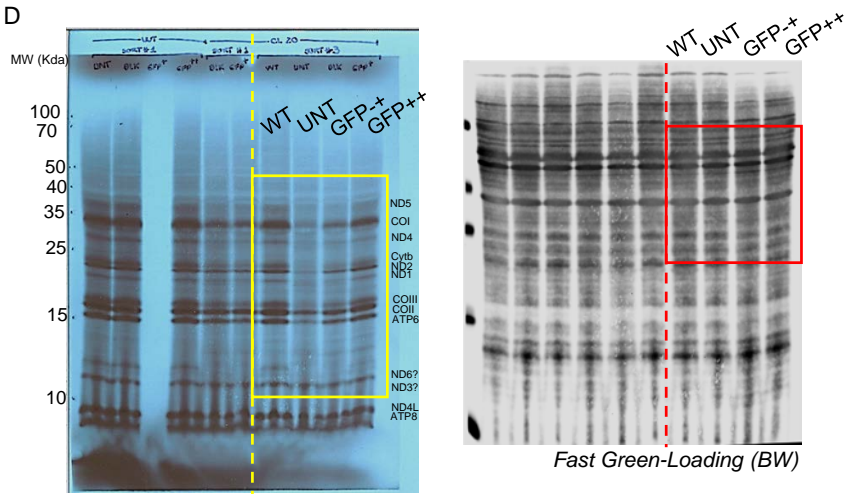

E

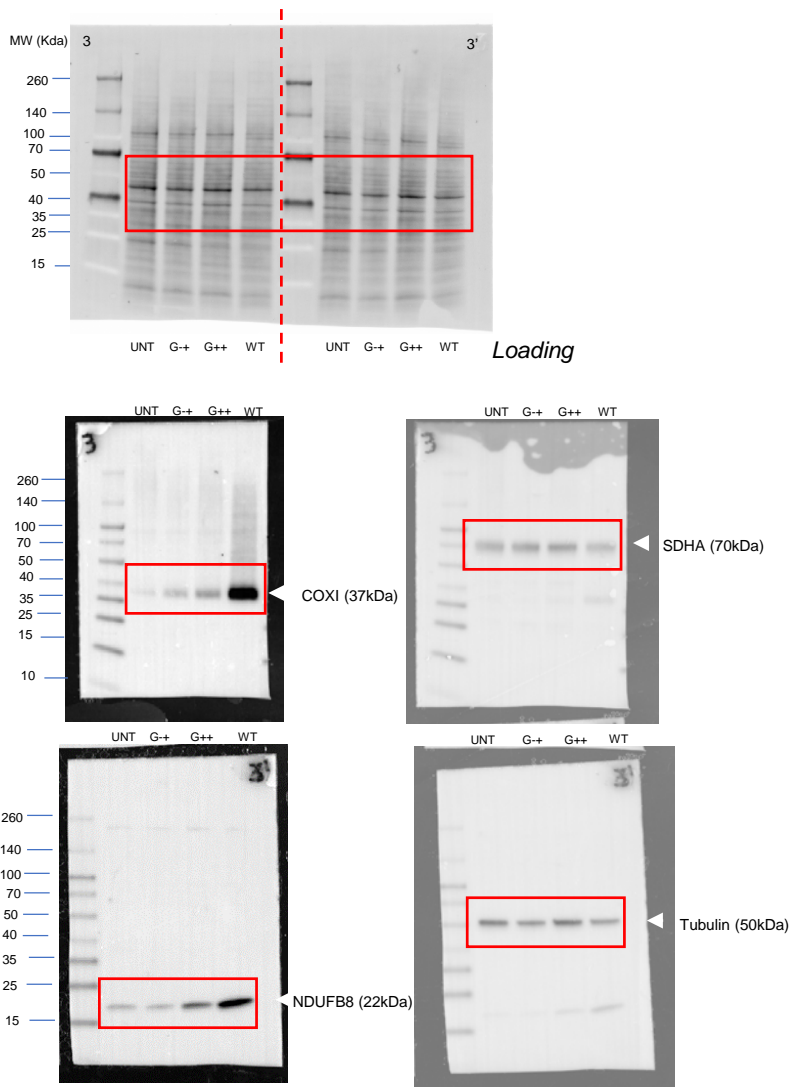

Supplement: EMMM-10-e8084-s006.pdf [file EMMM-10-e8084-s006.pdf]
